1        Consistent variations in personality traits and their potential for genetic improvement of  
2                                biocontrol agents: *Trichogramma evanescens* as a case study

3

4     Silène Lartigue<sup>a,b,c</sup>, Myriam Yalaoui<sup>b</sup>, Jean Belliard<sup>b</sup>, Claire Caravel<sup>b</sup>, Louise Jeandroz<sup>b</sup>,  
5     Géraldine Groussier<sup>b</sup>, Vincent Calcagno<sup>b</sup>, Philippe Louâpre<sup>c</sup>, François-Xavier Dechaume-  
6     Moncharmont<sup>d</sup>, Thibaut Malausa<sup>b</sup> and Jérôme Moreau<sup>c, e</sup>

7

8     <sup>a</sup> ENGREF AgroParisTech, Paris, France

9

10    <sup>b</sup> UMR Institut Sophia Agrobiotech, INRAE, UCA, CNRS, 06903 Sophia Antipolis, France

11

12    <sup>c</sup> UMR CNRS 6282 Biogéosciences, Université Bourgogne Franche-Comté, 6 Boulevard  
13    Gabriel, 21000 Dijon, France

14

15    <sup>d</sup> Univ Lyon, Université Claude Bernard Lyon 1, CNRS, ENTPE, UMR 5023 LEHNA, 69622  
16    Villeurbanne, France

17

18    <sup>e</sup> Centre d'Études Biologiques de Chizé, UMR 7372, CNRS & La Rochelle Université, 79360  
19    Villiers-en-bois, France

20

21    \* **Corresponding author:** S. Lartigue, UMR Institut Sophia Agrobiotech, INRAE, UCA,  
22    CNRS, Sophia Antipolis, France. E-mail address: [silene.lartigue@gmail.com](mailto:silene.lartigue@gmail.com)

23 **Abstract**

24 Improvements in the biological control of agricultural pests require improvements in the  
25 phenotyping methods used by practitioners to select efficient biological control agent (BCA)  
26 populations in industrial rearing or field conditions. Consistent inter-individual variations in  
27 behaviour (i.e. animal personality) probably affect BCA efficiency, but have never been taken  
28 into account in the development of phenotyping methods, despite having characteristics useful  
29 for phenotyping: repeatable (by definition), often heritable, etc. We developed a video-tracking  
30 method targeting animal personality traits and evaluated the feasibility of its use for genetic  
31 improvement in the BCA *Trichogramma evanescens*, by phenotyping 1,049 individuals from  
32 24 isogenic lines. We found consistent individual variations in boldness, activity and  
33 exploration. Personality differences between the 24 isogenic lines suggested a genetic origin of  
34 the variations in activity and exploration (broad-sense heritability estimates of 0.06 to 0.11) and  
35 revealed a trade-off between exploration and fecundity.

36 **Key words:** biocontrol, animal personality, *Trichogramma*, genetic improvement, intraspecific  
37 variation, behavioural ecology, behavioural syndrome, genetic correlations, pace-of-life

38

## 39 **Introduction**

40           The demand for more sustainable agriculture is increasing worldwide (Godfray et al.,  
41 2010; Willer & Lernoud, 2019). Various elements can be used in the development of sustainable  
42 strategies, and biological control (BC) is one such element that is currently attracting  
43 considerable attention (van Lenteren 2012). Most BC methods are based on the choice, rearing  
44 and introduction of biological control agent (BCA) populations able to control the target pests  
45 (Eilenberg, Hajek, & Lomer, 2001). Choosing the right BCA is key to the success of pest  
46 regulation programmes and is based on (i) the ability of the BCA to control pest populations in  
47 the field, (ii) its potential to adapt to the release environment, (iii) its expected impact on local  
48 biodiversity, and (iv) the feasibility of mass-rearing and storing the BCA in industrial conditions  
49 (Briese, 2000; Kruitwagen, Beukeboom, & Wertheim, 2018; Sforza, 2010). The identification  
50 of BCA species or populations with as many of the desired features as possible is time-  
51 consuming and complex, particularly given that the choice of non-indigenous species before  
52 use as BCAs is constrained by increasingly strict regulations for the protection of biodiversity  
53 (Lommen, Jong, & Pannebakker, 2017).

54           Phenotyping is key for (i) the efficient characterisation of traits related to the desirable  
55 features of BCAs listed above, (ii) smart choices of BC taxa when screening the available  
56 natural enemy diversity and (iii) the management of phenotypic evolution in industrial contexts  
57 involving rearing procedures and quality control (Kruitwagen et al., 2018; Lommen et al.,  
58 2017). However, the phenotyping methods currently used in the choice of BCAs or for quality  
59 control are mostly low-throughput and based on single proxies of fitness, such as predation or  
60 parasitism rate, size, sex ratio, longevity, or developmental rate (Hopper, Roush, & Powell,  
61 1993; Prezotti, Parra, Vencovsky, Coelho, & Cruz, 2004; Roitberg, Boivin, & Vet, 2001; Smith,  
62 1996). These proxies are intuitively correlated with fitness under laboratory conditions, but  
63 their actual relevance for biocontrol, in industrial mass-rearing or field conditions, remains a

64 matter of debate (Lommen et al., 2017; Roitberg et al., 2001). This situation calls for drastic  
65 improvements in the phenotyping capacities of the community involved in BC research and  
66 innovation.

67 Behavioural traits are among the most promising of the traits to which more attention  
68 could be paid in BCA phenotyping procedures. Most behavioural traits are likely to affect the  
69 performance of BCA both during industrial mass rearing and in the field (Roitberg, 2007;  
70 Wajnberg, 2009; Wajnberg, Roitberg, & Boivin, 2016). Indeed, studies of BCA behavioural  
71 traits have suggested that these traits could (i) facilitate the selection of BCAs that are specific  
72 to the targeted pest, (ii) improve release strategies (through studies of the BCA response to pre-  
73 release handling or BCA mating behaviour, for example), and (iii) predict the efficiency of  
74 target pest suppression by the BCA (Mills & Kean, 2010). However, there have been few  
75 studies of BCA behavioural traits for the development of phenotyping methods, and behaviour  
76 has been largely neglected by those using BC (Wajnberg, Bernstein, & Alphen, 2008).

77 As a consequence, the current state-of-the-art for insect behavioural studies displays  
78 several key limitations. The first limitation is the lack of diversity of possible target traits for  
79 phenotyping. Indeed, although many studies have focused on traits relating to foraging  
80 behaviour (Lirakis & Magalhães, 2019; Mills & Wajnberg, 2008), tools for measuring other  
81 aspects of behaviour remain scarce. A second limitation is the insufficient focus on the  
82 intraspecific variation of traits. Such variation has been comprehensively investigated for only  
83 a limited number of BCA species and a limited number of traits (Kruitwagen et al. 2018; Lirakis  
84 and Magalhães 2019) (but see however Dumont, Aubry, & Lucas, 2018; Dumont, Réale, &  
85 Lucas, 2017; Nachappa, Margolies, Nechols, & Campbell, 2011; Nachappa, Margolies,  
86 Nechols, & Morgan, 2010). This situation is detrimental because the investigation of only a  
87 fraction of the available intraspecific variability makes it difficult to identify the populations  
88 displaying the highest performance for biocontrol, and prevents the development of efficient

89 genetic improvement programmes based on selective breeding and controlled evolution  
90 (Wajnberg 2004; Bolnick et al. 2011; Lommen et al. 2017; Kruitwagen et al. 2018, Lirakis and  
91 Magalhães 2019). A third limitation is the reliance of most choices in BC exclusively on  
92 comparisons between average trait values for species or populations (Lommen et al., 2017).  
93 Published studies have suggested that individual variation can affect the characteristics of the  
94 population thought to be important for BC (Biro & Stamps, 2008; Michalko, Pekár, & Entling,  
95 2019; Réale, Reader, Sol, McDougall, & Dingemane, 2007; Wolf & Weissing, 2012).

96         One way to overcome each of these three limitations would be to apply approaches used  
97 in the field of animal personality to BC. Indeed, these approaches provide a framework offering  
98 (i) sets of behavioural traits rarely studied in BC and displaying features (repeatability,  
99 heritability) that make them good candidates for use in genetic improvement for BC, and (ii)  
100 phenotyping methods suitable for analyses of intraspecific variation, including inter-individual  
101 variation. Animal personality research focuses on inter-individual differences in behaviour that  
102 are consistent over time and context (Dingemane, Kazem, Reale, & Wright, 2009; Denis Réale  
103 et al., 2007). Interest in animal personality has increased over the last few decades, and studies  
104 have been performed on diverse taxa, including insects (Amat, Desouhant, Gomes, Moreau, &  
105 Monceau, 2018; Bell, Hankison, & Laskowski, 2009; Dingemane et al., 2009; Gosling, 2001;  
106 Kralj-fiser & Schuett, 2014; Mazué, Dechaume-Moncharmont, & Godin, 2015; Monceau et al.,  
107 2017; Denis Réale et al., 2007; Sih, Bell, & Johnson, 2004; van Ooers & Sinn, 2011) and, more  
108 specifically, insects used as BC agents (Gomes, Desouhant, & Amat, 2019; Michalko et al.,  
109 2019). Réale et al. (2007) described five main categories of personality traits: boldness,  
110 exploration, activity, aggressiveness and sociability. Boldness represents an individual's  
111 reaction to a risky but not new situation. Exploration is defined as an individual's reaction to a  
112 new situation. Activity reflects the general level of activity of an individual. Finally, in a social  
113 context, aggressiveness corresponds to an individual's agonistic reaction to his conspecifics,

114 and sociability provides information on an individual's reaction to the presence or absence of  
115 con-specifics. Personality traits have been shown to be correlated with traits relevant for pest  
116 control, such as foraging capacity, fecundity, growth, survival (Biro & Stamps, 2008), dispersal  
117 ability (Cote, Fogarty, Weinersmith, Brodin, & Sih, 2010) and insecticide resistance (Royauté,  
118 Buddle, & Vincent, 2014). These traits are probably, therefore, of interest in the context of BC.  
119 Moreover, personality traits are repeatable, by definition, and can be heritable (Dochtermann,  
120 Schwab, & Sih, 2014; Denis Réale et al., 2007; Stirling, Reale, & Roff, 2002), making them  
121 suitable tools for genetic improvement. From a methodological point of view, animal  
122 personality provides valuable information for the design of phenotyping and genetic  
123 improvement strategies in BC. Indeed, animal personality studies are based on standardised  
124 methods designed to measure inter-individual variation and to investigate correlations between  
125 traits (e.g. by looking for behavioural syndromes) (Denis Réale et al., 2007; Sih et al., 2004).  
126 This is particularly relevant to the objective of selecting several combined BC traits rather than  
127 a single trait, as recently recommended by Lommen et al. (2017) and Kruitwagen et al. (2018).  
128 The investigation of correlations between traits is also important, to detect trade-offs that may  
129 constrain genetic improvement programmes or affect BC traits if mass-rearing causes  
130 uncontrolled trait selection (Mackauer, 1976).

131 In this study, we assessed the potential for BCA phenotyping based on concepts and  
132 methods used in the field of animal personality. We used the egg parasitoid *Trichogramma*  
133 *evanescens* Westwood, 1833 (Hymenoptera: Trichogrammatidae) as a test species.  
134 *Trichogramma* micro-wasps are used worldwide in augmentative BC against lepidopteran pests  
135 (Hassan, 1993; van Lenteren, 2012). Their economic importance (Robin & Marchand, 2020;  
136 Thibierge, 2015) justifies investments in research and development aiming to improve their  
137 genetic potential. Our aims were (i) to determine whether behavioural traits meeting the criteria  
138 of personality traits could be measured in these micro-wasps of approximately 0.5 mm in

139 length; (ii) to investigate the relationships between personality traits and traits classically  
140 measured on BCAs in the laboratory, and (iii) to determine whether personality traits could be  
141 used in genetic improvement strategies for BCAs. We developed a method based on the video-  
142 tracking and measuring, at individual level, of multidimensional behavioural traits relating to  
143 boldness, activity and exploration. We investigated the relationship between these behavioural  
144 traits and further tested whether these traits were related to individual fitness traits relevant to  
145 mass rearing (offspring number, longevity, tibia length). We then compared the traits between  
146 24 near-isogenic strains, to obtain a first insight into the broad-sense heritability of these traits.  
147 We looked for genetic correlations potentially constraining the use of these traits for genetic  
148 improvement.

## 149 **Methods**

### 150 *Laboratory rearing of T. evanescens*

151 We used 24 near-isogenic lines (hereafter referred to as “lines”) of *Trichogramma*  
152 *evanescens*. Lines were created from inbred crosses in populations established from individuals  
153 sampled in different parts of France (geographic origins detailed in Table 7 in the appendix),  
154 from 2010 to 2016, and reared in the laboratory at  $18 \pm 1$  °C,  $70 \pm 10\%$  RH and 16:8 h L:D  
155 (details of the protocol followed to create the lines are provided in the appendix). Genetic  
156 diversity within lines was below 1.1 alleles per locus at 19 microsatellite loci (unpublished  
157 data), and individuals within lines were considered genetically identical. We created two  
158 sublines for each line (Lynch & Walsh, 1998), to disentangle the confounding effects of rearing  
159 tubes and lines (which may be caused by maternal effects). We considered variation between  
160 lines to be of genetic origin, and variation within lines to be of environmental origin. We reared  
161 *Trichogramma evanescens* individuals on sterilised *Ephestia kuehniella* Zeller 1879  
162 (Lepidoptera: Pyralidae) eggs, renewed every 10 days, at  $25.5 \pm 1$  °C,  $70 \pm 10\%$  RH and 16:8

163 h L:D (Schöller & Hassan, 2001). We kept populations in glass tubes (height: 73 mm, diameter:  
164 11 mm), and fed adults with honey *ad libitum*.

## 165 ***Measurement of variables***

### 166 *General experimental design*

167 The following experimental design was used to measure phenotypic traits in  
168 *Trichogramma* females (Figure 1). We used mated *T. evanescens* females that had emerged  
169 within the last 24 hours, randomly chosen from each line. We checked the physical integrity of  
170 these females, which were isolated in glass tubes before the beginning of the experiment  
171 (height: 73 mm, diameter: 11 mm) and fed with honey, *ad libitum*. On the first two days, we  
172 assessed the behavioural traits of the females. We estimated the number of offspring on days 3  
173 to 5, and longevity from day 6. The experiment lasted from May to July 2019 (about six  
174 generations of *T. evanescens*), and was split into 17 experimental sessions, in each of which,  
175 we used three females per line. The physiological, developmental and behavioural traits of  
176 *Trichogramma* wasps, and of *T. evanescens* in particular, are dependent on temperature (Ayvaz,  
177 A., Karasu, E., Karabörklü, S., Tunçbilek, 2008; Schöller & Hassan, 2001). Moreover, as  
178 Suverkropp et al. (2001) showed that *T. brassicae* individuals have similar levels of activity  
179 throughout the day at temperatures of about 25 °C or higher, we assumed that our *T. evanescens*  
180 individuals had similar responses to temperature throughout the day. Therefore, we performed  
181 the behavioural experiments at  $25.5 \pm 1$  °C,  $70 \pm 10\%$  RH. We then measured female longevity  
182 and offspring number at  $18 \pm 1$  °C,  $70 \pm 10\%$  RH, to ensure that the females would live long  
183 enough for the final stages of the experiment (Cônsoi & Parra, 1995; Schöller & Hassan, 2001).

184

185

186



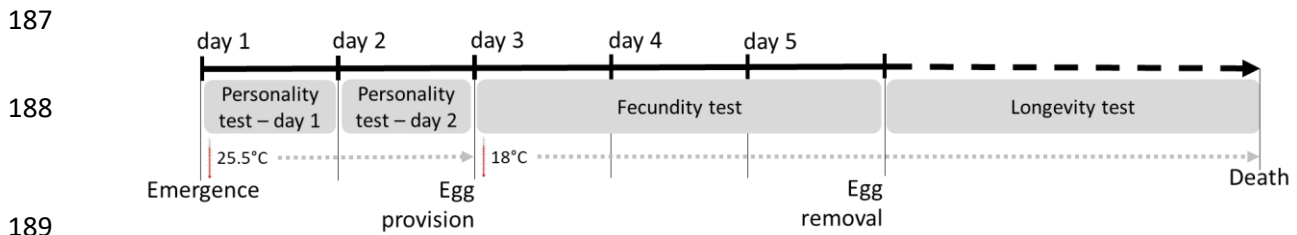

190 **Figure 1.** Overview of the experimental design, for one session.

### 191 *Behavioural trait measurement*

192 We observed individuals in an arena composed of two sheets of glass (24 cm x 18 cm),  
193 one for the floor and one for the ceiling. The 2 mm space between them was maintained by  
194 walls made of a black rubber sheet. We placed this arena on an LCD screen (Samsung© 28”  
195 LED, 3840\*2160 pixels, 60 Hz) which was used to display a white circle with a diameter of 5.5  
196 cm on a dark background (Figure 2.a). The LCD screen was turned on one hour before the  
197 beginning of the experiment, to ensure that a stable temperature of  $25.5 \pm 1$  °C was achieved in  
198 the area. The conditions in the growth chamber in which the experimental design was set up  
199 were as follows:  $22.5 \pm 1$  °C and  $70 \pm 10\%$  RH. We used a fine paintbrush to introduce a  
200 randomly chosen female into the centre of the arena while the screen was showing a white  
201 background. The glass ceiling was replaced, and we then switched to a background with a white  
202 circle on a dark background, with the female positioned in the middle of the white circle. We  
203 observed the behaviour of the female for 90 seconds, with video recording at 25 frames per  
204 second (with a resolution of 1080 p), with a Nikon© D750 camera (Figure 2.a).

205 We then analysed the videos files, determining the 2D spatial position ( $x$ - $y$  coordinates)  
206 and body orientation (in radians) of the female on each frame, with C-trax software (Branson,  
207 Robie, Bender, Perona, & Dickinson, 2009). We independently determined the exact position  
208 of the border between the white circle and the black background with ImageJ software  
209 (Abràmoff, Magalhães, & Ram, 2004). We thus defined regions of interest of 0.5 cm on either  
210 side of the border, for investigation of the behaviour of the insect near the border (Figure 2.b).

211 We imported the C-trax and ImageJ output files into R software v.3.6.1 (R Core Team 2019)  
212 and cleaned our data to remove tracking artefacts. We used the “trajr” package (Mclean &  
213 Volponi, 2018) to calculate speed and sinuosity, in each region of interest. We calculated seven  
214 variables we considered to be linked to three personality traits — boldness, exploration and  
215 activity — as defined by Réale et al. (2007). As we measured all the variables linked to the  
216 three personality traits in the same arena (for feasibility reasons, considering the lifespan of  
217 individuals in particular), we decided to measure each variable set linked to each personality  
218 trait on a different area of the arena to increase their extent of independence.

219         Boldness is the reaction of the individual to a risky situation (Réale et al., 2007). We  
220 estimated boldness by measuring three variables. The first was the time until the female first  
221 entered the dark area (area 3 in Figure 2.b). Higher values indicated that the female took longer  
222 to cross the border, which we interpreted as meaning that the female was less bold. The second  
223 and third variables were the absolute difference in speed between areas 2 and 1 (Figure 2.b) and  
224 the absolute difference in sinuosity between areas 2 and 1 (Figure 2.b). We considered high  
225 values for these two variables to indicate a larger change in behaviour at the border, which we  
226 interpreted as meaning that the female was more affected by the border and was, therefore, less  
227 bold.

228         Exploration represents the individual's reaction to a new environment (Réale et al.,  
229 2007). Exploration was estimated in area 1 as (1) the total area explored per unit time, and (2)  
230 the mean sinuosity of the pathway (Figure 2.b). For this variable, we hypothesised that the  
231 females with the most winding pathways remained closer to their release point, indicating a  
232 lower level of exploration.

233         Finally, we measured activity in area 4. Activity was estimated as (i) the proportion of  
234 time the female was considered to be active (with a speed of more than 0.01 centimetres per

235 second), referred to hereafter as “activity rate”, and (ii) mean speed (Figure 2.b), considering  
236 faster movement to be indicative of a higher level of activity.

237 We estimated the repeatability of measurements, by conducting two observations per  
238 female, with 24 hours between the two measurements, a time interval corresponding to 20% of  
239 the mean lifespan of this species. Females were tested in a random order on day 1, and then in  
240 the same order on day 2, to ensure that all individuals had exactly the same time interval  
241 between two measurements. Between behavioural experiments, each female was placed back  
242 in its glass tube and fed with honey, *ad libitum*, in a growth chamber at  $25.5 \pm 1$  °C,  $70 \pm 10\%$   
243 RH and 16:8 h L:D. Behavioural trait measurements were obtained for 776 to 996 females in  
244 total from the 24 lines.

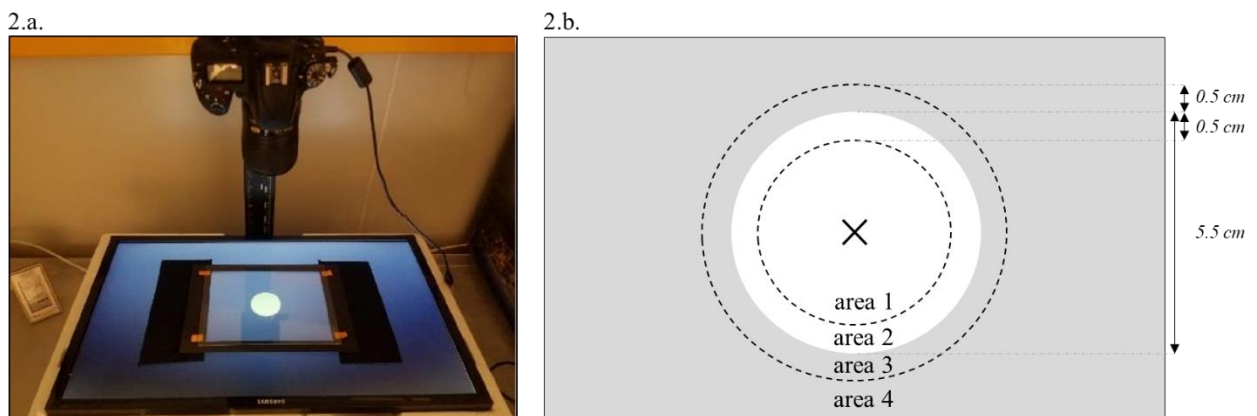

245  
246 **Figure 2.** Experimental set-up of the behavioural experiment. Fig. 2.a. shows a photograph of the experimental  
247 setup: the LCD screen displaying the white circle on a dark background, the arena and the Nikon® D750 camera  
248 above. Fig. 2.b. represents the defined areas of the arena. The grey shading corresponds to the dark background,  
249 the white part indicates the white circle, and the dark cross is the site at which the female was placed at the start  
250 of the experiment. The dotted lines represent the virtual borders defined between areas 1 and 2, and between areas  
251 3 and 4. The three variables we measured to estimate boldness were (i) the first time until the female first entered  
252 the dark area (area 3), (ii) the absolute difference in speed between areas 2 and 1, and (iii) the absolute difference  
253 in sinuosity between areas 2 and 1. Both variables we used to estimate exploration (the total area explored per unit  
254 time and the mean sinuosity of the pathway) were measured in area 1. Finally, both variables we used to estimate

255 activity (the proportion of time the female was considered to be active and the mean speed) were measured in area  
256 4, so exploration and activity were measured in different areas of the experimental arena.

### 257 *Offspring number, longevity and tibia length measurement*

258 After the second day of behavioural observation, females were kept in their glass tubes  
259 at  $18 \pm 1$  °C,  $70 \pm 10\%$  RH and 16:8 h L:D and fed with honey, *ad libidum*. We provided each  
260 female with a piece of paper 4.50 cm x 0.85 cm in size, covered with *E. kuehniella* eggs, *ad*  
261 *libidum*. *E. kuehniella* eggs were removed 72 hours later and placed in conditions of  $25.5 \pm 1$   
262 °C,  $70 \pm 10\%$  RH and 16:8 h L:D. Three days later, we counted the number of parasitised eggs  
263 (considered as black eggs), to estimate the size of the progeny of each female over a period of  
264 72 hours, providing a proxy for female fitness. From day 6, we measured female longevity (the  
265 females were still kept in the same individual tubes with honey, but with no *E. kuehniella* eggs,  
266 at  $18 \pm 1$  °C,  $70 \pm 10\%$  RH and 16:8 h L:D). Tubes were checked every day at 5 p.m., until the  
267 death of the female. Dead females were conserved in ethanol, for subsequent measurement of  
268 tibia length on a micrograph (obtained with an Axioplan II microscope), with ImageJ software  
269 (Abràmoff et al., 2004). Images were acquired at the Microscopy Platform of Sophia  
270 Agrobiotech Institute, INRA, UNS, CNRS, UMR 1355-7254, INRA PACA, Sophia Antipolis.  
271 Not all individuals lived long enough for all the phenotypic measurements to be made. We  
272 therefore collected progeny measurements for 929 females, longevity measurements for 655  
273 females and tibia size measurements for 959 females, from all 24 lines.

### 274 *Data analysis*

275 We used the R software v.3.6.1 for all statistical analyses. For each variable, we first  
276 fitted a linear mixed model with the lme4 package (Bates, Maechler, Bolker, & Walker, 2015),  
277 with individual, line, subline and session as random effects. For each variable, data  
278 transformations were chosen after graphical inspection of the distribution of model residuals,  
279 estimated with the “simulateResiduals” function of the DHARMA package (Hartig, 2019). We

280 performed logarithmic transformations for all behavioural variables except for the area explored  
281 within area 1. We addressed several questions regarding the data, and the data analysis for each  
282 of these questions is presented below.

283 *Are the measured behavioural traits repeatable?*

284 We first estimated the repeatability of the behavioural traits measured with generalised  
285 linear mixed models, using the rptR package (Stoffel, Nakagawa, & Schielzeth, 2017). The  
286 “rptGaussian” function of the rptR package was used to provide repeatability estimates. As  
287 repeatability can be defined as the proportion of variation explained by between-individual  
288 variation (Nakagawa & Schielzeth, 2010), we included only two random effects in these  
289 models: individual (assuming that the effects of line and subline on variation were included in  
290 the individual effect) and session, with individual as a grouping factor. In subsequent analyses,  
291 we considered only traits that were significantly repeatable.

292 *Do the measured traits identify individual behavioural strategies?*

293 Based on methods generally used in animal personality studies, we first investigated  
294 correlations between behavioural traits and then summarized the data by principal component  
295 analysis (PCA). We first obtained a single value for each trait for each individual, by extracting,  
296 from the linear mixed model described above, linear predictors for each individual, with the  
297 “ranef” function of the lme4 package. We used these values to measure the phenotypic  
298 correlation between traits, by calculating Spearman’s rank correlation coefficients, to determine  
299 whether individuals adopted different strategies, or whether it was possible to describe  
300 behavioural syndromes. We estimated bootstrapped 95% confidence intervals from 1000  
301 bootstraps, to assess the significance of the Spearman's rank correlation coefficients obtained  
302 (Nakagawa & Cuthill, 2007), using the “spearman.ci” function of the RVAideMemoire package  
303 (Hervé, 2020). *P*-values were adjusted by the false discovery rate method (Benjamini &

304 Hochberg, 1995). We then performed PCA with the “PCA” function of the FactoMineR  
305 package (Le, Josse, & Husson, 2008), using both values obtained for each individual (days 1  
306 and 2, when available). We estimated two synthetic personality scores based on the first two  
307 axes of the PCA. We used the “fviz\_pca\_biplot” function of the factoextra package  
308 (Kassambara & Mundt, 2019) to obtain a graphical representation of the correlation between  
309 repeatable behavioural traits and the distribution of individual values along the two first axes  
310 of the PCA.

311 *Are the measured traits correlated with fitness-related traits?*

312 We studied the correlation between behavioural and fitness-related traits, using the same  
313 linear mixed model as described in the introduction to this section. We extracted linear  
314 predictors (using the “ranef” function of the lme4 package (Bates et al., 2015)) for each  
315 individual and each personality score from this model. We assessed the correlation between the  
316 linear predictors of these personality traits and scores, and offspring number, body size and  
317 longevity, by calculating Spearman’s rank correlation coefficients. We estimated bootstrapped  
318 95% confidence intervals to assess significance of the Spearman's rank correlation coefficients  
319 obtained, with the same R function and method as described above. *P*-values were adjusted by  
320 the false discovery rate method.

321 *Are the measured traits heritable?*

322 We sought to establish a first estimate of broad-sense heritability for each trait. To this  
323 end, we followed the simple design proposed by Lynch and Walsh (1998) for clonal  
324 populations, and approximated the proportion of the variance explained by genetic factors with  
325 an estimate of the proportion of variance explained by the line effect in our generalised linear  
326 mixed models. This estimate was obtained with the “rptGaussian” function of the rptR package  
327 (Stoffel et al., 2017), with models including line, subline, individual and session as random  
328 effects, and line as a grouping factor.

329 *Do personality traits differentiate the isogenic lines?*

330 We compared the personality scores of the 24 lines, taking into account variation due to  
331 individual, subline and session effects. With the values of each personality score extracted from  
332 the PCA (see above), we first fitted a linear mixed-effects model with the “lmer” function of  
333 the lme4 package (Bates et al., 2015), with line as a fixed effect and individual, subline and  
334 session effects as random effects. We performed a Tukey all-pairs comparison on lines with the  
335 “glht” function of the multcomp package (Hothorn, Bretz, & Westfall, 2008). We graphically  
336 represented the distribution of each line along the two personality scores, for the same PCA as  
337 described above, estimated from individual values. We then used the “plot.PCA” function of  
338 the FactoMineR package to represent only mean point values for each line on the graph.

339 *Are personality traits genetically correlated with fitness-related traits?*

340 We investigated the genetic correlation between genetic traits, using the same linear  
341 mixed model as described in the introduction to this section. We first extracted linear predictors  
342 for each line and trait, with the “ranef” function of the lme4 package. We then used these values  
343 to calculate Spearman’s rank correlation coefficients. We estimated bootstrapped 95%  
344 confidence intervals, to assess significance of the Spearman's rank correlation coefficients, and  
345 adjusted the *p*-values as described above.

## 346 **Results**

347 *Are the measured behavioural traits repeatable?*

348 Repeatability estimates for the seven behavioural traits ranged from 0.04 to 0.35 (Table  
349 1). The repeatability estimates had confidence intervals excluding zero for all traits except for  
350 “time to first crossing of the border between the white and black areas” (Table 1). Only  
351 repeatable traits were considered in the subsequent analysis.

352 **Table 1.** Estimated repeatability (R) and 95% confidence intervals (between square brackets) for behavioural traits.  
353 Repeatable traits (R-value in bold type) were used to estimate personality scores.

| Personality trait category | Variable assessed                                | R [95% CI]               |
|----------------------------|--------------------------------------------------|--------------------------|
| <b>Activity</b>            | Mean speed in area 4                             | <b>0.35</b> [0.29; 0.40] |
|                            | Activity rate in area 4                          | <b>0.08</b> [0.01; 0.14] |
| <b>Boldness</b>            | Change of speed in the border area (area 2)      | <b>0.10</b> [0.04; 0.17] |
|                            | Change of sinuosity in the border area (area 2)  | <b>0.12</b> [0.04; 0.19] |
|                            | Time to first crossing of the white/black border | 0.04 [0.00; 0.11]        |
| <b>Exploration</b>         | Sinuosity in area 1                              | <b>0.24</b> [0.17; 0.30] |
|                            | Area explored in area 1                          | <b>0.18</b> [0.12; 0.24] |

354

355 *Do the measured traits identify individual behavioural syndromes?*

356 All repeatable variables were correlated with at least one other variable (Table 2),  
357 indicating the existence of a behavioural syndrome. We combined these six variables into two  
358 personality scores based on the first two axes of a PCA, which accounted for 56.8% of the  
359 variance (Table 3). The first axis (personality score 1, PC1) was positively correlated with the  
360 “area explored in area 1” and inversely correlated with “sinuosity in area 1” and with the  
361 “change of sinuosity in the border area 2” (Table 3). Highly positive values of PC1  
362 corresponded to a high exploration score (Figure 3). The second axis (personality score 2, PC2)  
363 and correlated mostly with “mean speed in area 4”, “activity rate in area 4” and the “change of  
364 speed in border area 2” (Table 3). High positive values of PC2 correspond to high activity scores  
365 (Figure 3).

366

367

368

369

370



371 **Table 2.** Phenotypic correlation between behavioural variables, with Spearman's rank correlation coefficient Rho  
 372 and 95 percent confidence intervals (between square brackets), based on a number of individual values from N =  
 373 977 to N = 1009. Correlation coefficients with confidence intervals excluding zero are shown in bold, and  
 374 correlation coefficients remaining significantly different from zero after Benjamini and Hochberg correction are  
 375 indicated with an asterisk. The personality trait category to which each variable belongs is indicated in brackets:  
 376 activity (A), boldness (B) and exploration (E).

|                                                 | <b>(B) Change of speed in border area 2</b> | <b>(A) Mean speed in area 4</b> | <b>(A) Activity rate</b>         | <b>(B) Change of sinuosity in border area 2</b> | <b>(E) Sinuosity in area 1</b>   |
|-------------------------------------------------|---------------------------------------------|---------------------------------|----------------------------------|-------------------------------------------------|----------------------------------|
| <b>(A) Mean speed in area 4</b>                 | <b>0.31</b><br>[0.25; 0.37] *               |                                 |                                  |                                                 |                                  |
| <b>(A) Activity rate in area 4</b>              | <b>0.10</b><br>[0.04; 0.16] *               | <b>0.38</b> *<br>[0.32; 0.43] * |                                  |                                                 |                                  |
| <b>(B) Change of sinuosity in border area 2</b> | <b>0.11</b><br>[0.05; 0.17] *               | <b>0.07</b><br>[0.01; 0.14] *   | <b>-0.12</b><br>[-0.18; -0.06] * |                                                 |                                  |
| <b>(E) Sinuosity in area 1</b>                  | <b>-0.07</b><br>[-0.14; -0.01] *            | <b>0.13</b><br>[0.07; 0.19] *   | <b>-0.16</b><br>[-0.22; -0.10] * | <b>0.38</b><br>[0.32; 0.44] *                   |                                  |
| <b>(E) Area explored in area 1</b>              | <b>0.11</b><br>[0.04; 0.16] *               | 0.01<br>[-0.04; 0.08]           | <b>0.29</b><br>[0.23; 0.34] *    | <b>-0.28</b><br>[-0.34; -0.22] *                | <b>-0.56</b><br>[-0.61; -0.52] * |

377

378 **Table 3.** Parameters from the first two principal components (PC1 and PC2) of the PCA for the behavioural  
 379 variables measured. Component loadings represent the relationship between the principal components and the  
 380 variables from which they are constructed. The personality trait category to which each variable belongs is  
 381 indicated in brackets: activity (A), boldness (B) and exploration (E).

| Parameter                                | PC1   | PC2   |
|------------------------------------------|-------|-------|
| Eigenvalue                               | 1.87  | 1.54  |
| Percentage of variance explained         | 31.23 | 25.58 |
| Component loading                        |       |       |
| <i>(A) Mean speed in area 4</i>          | 0.16  | 0.84  |
| <i>(A) Activity rate in area 4</i>       | 0.43  | 0.60  |
| <i>(B) Change of speed in area 2</i>     | 0.19  | 0.51  |
| <i>(B) Change of sinuosity in area 2</i> | -0.56 | 0.34  |
| <i>(E) Area explored in area 1</i>       | 0.81  | -0.09 |
| <i>(E) Sinuosity in area 1</i>           | -0.81 | 0.27  |

382

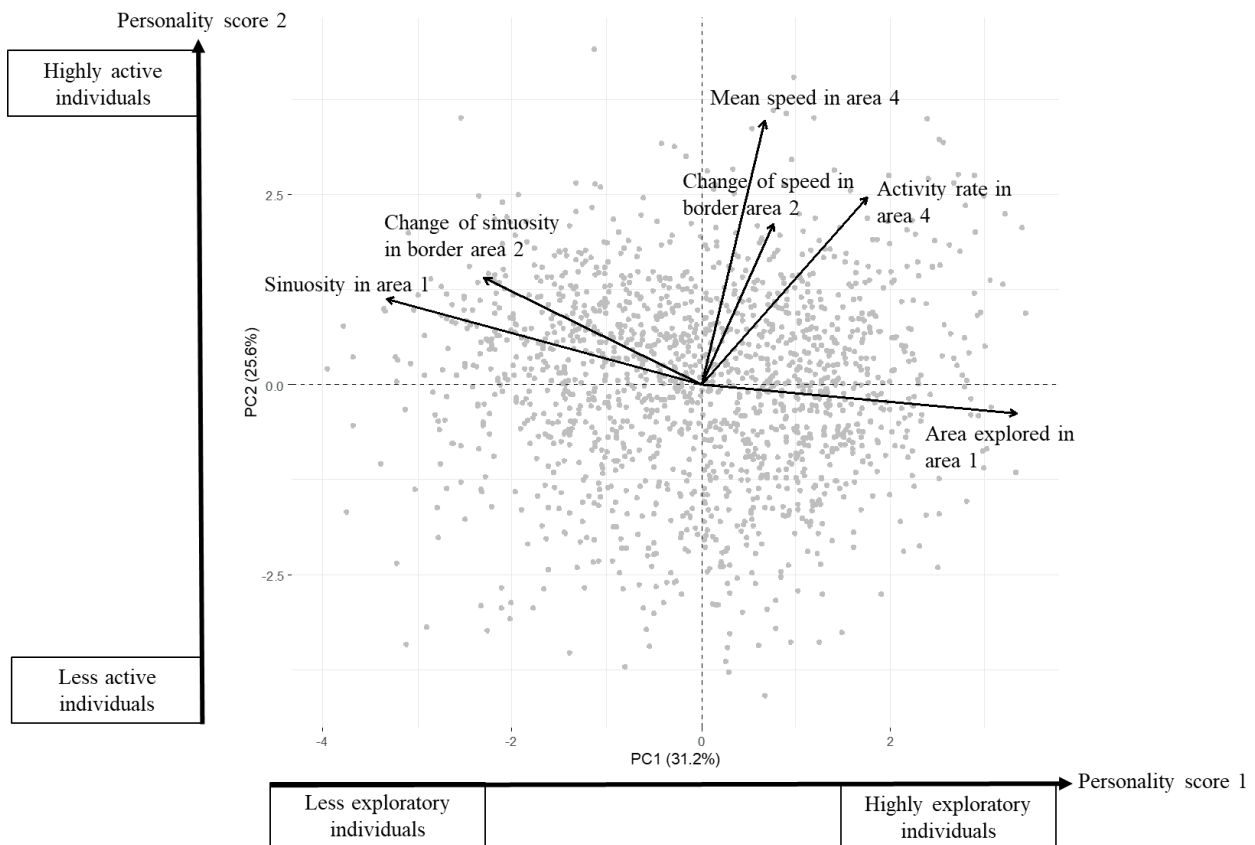

383 **Figure 3.** Graphical representation of the first two axes of the PCA on individual values (grey points) for  
384 repeatable behavioural traits (in black type).

385 *Are the measured traits correlated with fitness-related traits?*

386 Active females (i.e. those with higher PC2 values) had significantly larger numbers of  
387 offspring and significantly longer tibias (Table 4). Higher rates of exploration (i.e. higher PC1  
388 values) were not significantly correlated with any of the fitness-related traits measured. None  
389 of the behavioural variables or personality scores was significantly correlated with longevity  
390 (Table 4).

391

392

393

394

395 **Table 4.** Phenotypic correlation between behavioural traits (behavioural variables and personality scores) and  
 396 other life history traits (with Spearman’s rank correlation coefficient Rho and 95% confidence intervals (between  
 397 square brackets) calculated from 959 individual values). Correlation coefficients with confidence intervals  
 398 excluding zero are shown in bold, and correlation coefficients that remained significantly different from zero after  
 399 Benjamini and Hochberg correction are indicated with an asterisk. The personality trait category to which each  
 400 variable belongs is indicated in brackets: activity (A), boldness (B) and exploration (E).

|                                          | Offspring number           | Longevity           | Tibia length               |
|------------------------------------------|----------------------------|---------------------|----------------------------|
| <b>Behavioural variables</b>             |                            |                     |                            |
| (A) Mean speed in area 4                 | <b>0.20 [0.14; 0.26] *</b> | -0.05 [-0.12; 0.03] | <b>0.19 [0.12; 0.25] *</b> |
| (A) Activity rate in area 4              | -0.01 [-0.08; 0.06]        | -0.06 [-0.13; 0.02] | -0.07 [-0.13; 0.00]        |
| (B) Change of speed in border area 2     | <b>0.13 [0.06; 0.19] *</b> | -0.08 [-0.15; 0.00] | <b>0.16 [0.10; 0.21] *</b> |
| (B) Change of sinuosity in border area 2 | <b>0.11 [0.04; 0.17] *</b> | 0.002 [-0.07; 0.08] | 0.05 [-0.01; 0.11]         |
| (E) Area explored in area 1              | -0.05 [-0.11; 0.01]        | -0.05 [-0.13; 0.02] | -0.02 [-0.09; 0.04]        |
| (E) Sinuosity in area 1                  | 0.01 [-0.05; 0.07]         | 0.05 [-0.02; 0.13]  | 0.05 [-0.01; 0.11]         |
| <b>Personality scores</b>                |                            |                     |                            |
| Exploration score 1 (PCI)                | -0.01 [-0.07; 0.06]        | -0.05 [-0.13; 0.03] | -0.03 [-0.09; 0.03]        |
| Activity score 2 (PC2)                   | <b>0.17 [0.10; 0.23] *</b> | -0.01 [-0.10; 0.07] | <b>0.15 [0.09; 0.21] *</b> |

401

402 *Are the measured traits heritable?*

403 Broad-sense heritability estimates for behavioural traits and personality scores ranged  
 404 from 0.01 to 0.11. Confidence intervals excluded zero for all traits linked to activity and  
 405 exploration, whereas they included zero for the two traits linked to boldness (Table 5). Fitness-  
 406 related traits (offspring number, tibia length and longevity) displayed broad-sense heritability  
 407 ranging from 0.04 to 0.28, with all confidence intervals excluding zero (Table 5).

408

409

410

411

412 **Table 5.** Broad-sense heritability ( $H^2$ ) of traits measured with 95% confidence intervals (between square brackets).  
413 Heritability estimates are shown in bold if their 95% confidence interval did not include zero. The personality trait  
414 category to which each behavioural variable belongs is indicated in brackets: activity (A), boldness (B) and  
415 exploration (E).

|                                          | $H^2$ [95% CI]           |
|------------------------------------------|--------------------------|
| <b>Behavioural variables</b>             |                          |
| (A) Mean speed in area 4                 | <b>0.11</b> [0.05; 0.18] |
| (A) Activity rate in area 4              | 0.02 [0.00; 0.04]        |
| (B) Change of speed in border area 2     | 0.01 [0.00; 0.03]        |
| (B) Change of sinuosity in border area 2 | 0.01 [0.00; 0.03]        |
| (E) Area explored in area 1              | <b>0.06</b> [0.02; 0.10] |
| (E) Sinuosity in area 1                  | <b>0.06</b> [0.02; 0.11] |
| <b>Personality scores</b>                |                          |
| Exploration score 1 (PC1)                | <b>0.08</b> [0.03; 0.13] |
| Activity score 2 (PC2)                   | <b>0.05</b> [0.02; 0.10] |
| <b>Fitness-related traits</b>            |                          |
| Offspring number                         | <b>0.12</b> [0.05; 0.19] |
| Tibia length                             | <b>0.05</b> [0.01; 0.09] |
| Longevity                                | <b>0.28</b> [0.14; 0.39] |

416

417 *Do personality traits differentiate between lines?*

418 We found significant differences in personality scores between lines (Figure 4.a and  
419 4.b), and the 24 lines were distributed along the first two axes of the PCA (Figure 5). We were  
420 therefore able to distinguish between lines that were very active and exploratory (e.g., lines 3  
421 and 12), and lines that were less active and exploratory (e.g., lines 14 and 21); we were also  
422 able to distinguish between lines that were very exploratory but not very active (e.g., lines 9  
423 and 10) and lines that were active but not very exploratory (for example line 4).

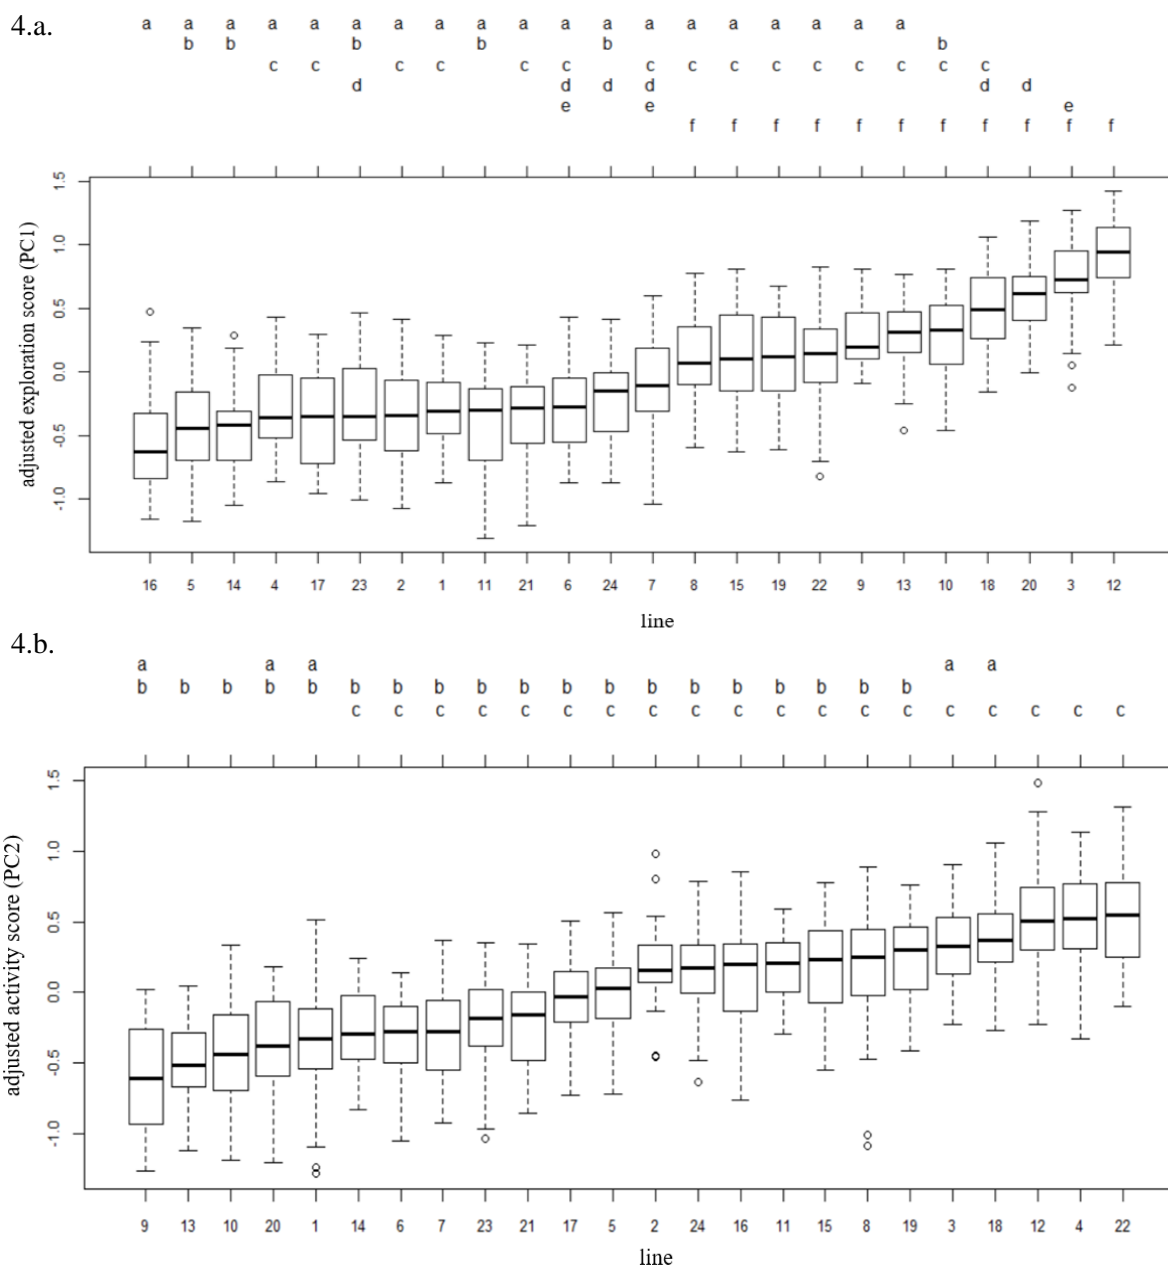

424

425 **Figure 4.** Boxplot of the adjusted values of personality score 1 (Fig. 4.a) and personality score 2 (Fig. 4.b) after  
 426 the elimination of variation due to individual, subline and session effects, and compact letter display after Tukey  
 427 all-pair comparisons. Two lines with no letters in common are considered to be significantly different (with a p-  
 428 value <0.05).

429

430

431

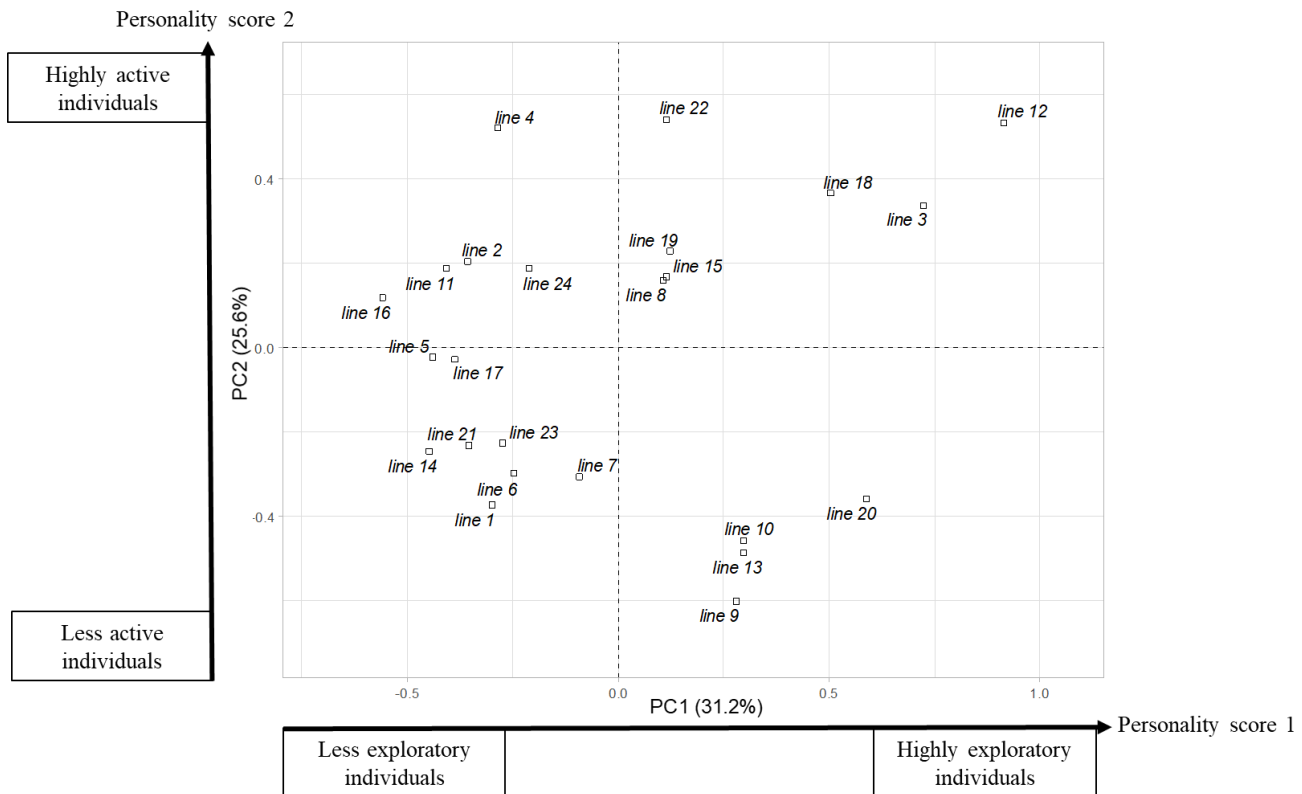

432

433 **Figure 5.** Distribution of the mean points for the 24 lines (centroids) along the first two axes of the PCA.

434 *Are personality traits genetically correlated with fitness-related traits?*

435 The only genetic correlation between personality scores and fitness-related traits that  
436 remained significant after FDR correction was the positive correlation between exploration  
437 score (PC1) and offspring number (Table 6).

438

439

440

441

442

443 **Table 6.** Genetic correlation between personality and other life history traits (Spearman's rank correlation  
 444 coefficient, based on the trait estimates of 24 near-isogenic lines, with associated p-values in brackets). Correlation  
 445 coefficients with confidence intervals excluding zero are shown in bold, and correlation coefficients that remained  
 446 significantly different from zero after Benjamini and Hochberg correction are indicated with an asterisk. The  
 447 personality trait category to which each behavioural variable belongs is indicated in brackets: activity (A), boldness  
 448 (B) and exploration (E).

|                                          | Offspring number              | Longevity                   | Tibia length             |
|------------------------------------------|-------------------------------|-----------------------------|--------------------------|
| <b>Behavioural variables</b>             |                               |                             |                          |
| (A) Mean speed in area 4                 | -0.16 [-0.54; 0.33]           | -0.32 [-0.62; 0.06]         | <b>0.51 [0.21; 0.70]</b> |
| (A) Activity rate in area 4              | <b>-0.53 [-0.78; -0.14]</b>   | 0.15 [-0.28; 0.54]          | -0.21 [-0.62; 0.28]      |
| (B) Change of speed in border area 2     | -0.03 [-0.44; 0.37]           | <b>-0.45 [-0.72; -0.10]</b> | 0.35 [-0.05; 0.63]       |
| (B) Change of sinuosity in border area 2 | 0.29 [-0.11; 0.63]            | 0.15 [-0.31; 0.56]          | 0.19 [-0.20; 0.54]       |
| (E) Area explored in area 1              | <b>-0.60 [-0.79; -0.26] *</b> | 0.01 [-0.40; 0.43]          | -0.28 [-0.65; 0.16]      |
| (E) Sinuosity in area 1                  | <b>0.63 [0.33; 0.82] *</b>    | 0.25 [-0.20; 0.62]          | -0.03 [-0.43; 0.39]      |
| <b>Personality scores</b>                |                               |                             |                          |
| Exploration score 1 (PC1)                | <b>-0.64 [-0.83; -0.29] *</b> | -0.09 [-0.52; 0.32]         | -0.19 [-0.58; 0.24]      |
| Activity score 2 (PC2)                   | -0.10 [-0.52; 0.39]           | -0.22 [-0.66; 0.19]         | <b>0.41 [0.01; 0.67]</b> |

449

## 450 **Discussion**

451 We investigated whether animal personality could be used to develop or improve  
 452 phenotyping methods for the BCA *Trichogramma evanescens*. We first developed an  
 453 automated phenotyping method based on automated pathway analysis, providing a set of  
 454 behavioural trait measures that proved repeatable over time and heritable (i.e. personality traits).  
 455 We then identified differences in life history strategies between individuals as behavioural traits  
 456 were correlated together and combined them into personality scores, which were correlated with  
 457 other life history traits. Finally, we observed differences in personality scores between the 24  
 458 genotypes of *T. evanescens* and found a negative genetic correlation between exploration and  
 459 fecundity.

## 460 ***Evidence of personality traits in Trichogramma evanescens***

461 Personality has never before been assessed in a species as small as *Trichogramma*  
462 *evanescens*. Based on other video-tracking studies in other species (Branson et al., 2009;  
463 Charalabidis, Dechaume-Moncharmont, Petit, & Bohan, 2017), we designed and developed a  
464 video-tracking approach measuring a large number of variables relating to the movements of *T.*  
465 *evanescens* individuals during their presence in the different areas (white, black and border  
466 areas) within an experimental arena. Here, we chose to work on seven variables that (i) could  
467 be calculated with methods commonly used in trajectory and movement studies (speeds,  
468 trajectory length and sinuosity estimates) (Mclean & Volponi, 2018) and (ii) we considered to  
469 be associated with some of the commonly defined personality traits defined by Réale et al.  
470 (2007): boldness, exploration and activity.

471 For each of the seven behavioural variables, we assessed repeatability, broad-sense  
472 heritability and phenotypic and genetic correlations between personality traits and between  
473 these traits and other life history traits, according to methods generally used in animal  
474 personality studies (Réale et al., 2007). For six of the seven behavioural variables, we observed  
475 significant repeatability (R) (values ranging from 0.10 to 0.35, Table 1). These six variables  
476 could therefore be considered as personality traits. The R values obtained were within the range  
477 of R values commonly observed for behavioural traits, although most were lower than the mean  
478 R value obtained for animal behaviour (0.35) (Bell et al., 2009). However, personality has rarely  
479 been studied in parasitoid insects, and a recent study on the parasitoid wasp *Venturia canescens*  
480 reported a similar R value for activity and a lower R value for exploration (about 0.10, whereas  
481 we obtained R values for exploration-related variables of 0.18 and 0.24(Gomes et al., 2019)).

482 The broad-sense heritability of the variables (ranging from 0.06 to 0.11, Table 5) was  
483 lower than the mean value for animal behaviour (0.24) in the meta-analysis by Dochtermann et  
484 al. (2019). Stirling et al. (2002) found no significant differences in heritability between  
485 behavioural and life-history traits in their meta-analysis, whereas we found that heritability



486 values for personality traits were lower than heritability values of two classical fitness-related  
487 traits (offspring number and longevity) in *T. evanescens* (Table 5).

488 Behavioural traits could be grouped together into two continuums or behavioural  
489 syndromes (Denis Réale et al., 2007; Sih et al., 2004; Sih, Cote, Evans, Fogarty, & Pruitt, 2012):  
490 a continuum extending from individuals with low levels of exploratory behaviour to highly  
491 exploratory individuals, and a continuum extending from individuals with low levels of activity  
492 to highly active individuals (Figure 3). Bold (or shy) behaviour and active behaviour have been  
493 shown to be correlated with fecundity traits in several species (Biro & Stamps, 2008), but rarely  
494 in insects (Monceau et al., 2017). In this study, we found a weak but significant phenotypic  
495 correlation between behavioural traits, fecundity and body length, as shy or active females  
496 produced more offspring, and had longer tibias (Table 4). The positive correlation between  
497 activity (with the variable “mean speed”) and the length of tibia is quite intuitive, as it should  
498 be easier for individuals with longer tibia to cover larger distance. Moreover, bigger females  
499 would have more energy to spend for both offspring production and activity. However, although  
500 these positive correlations might have been expected, they are equivocal in the literature and  
501 seem to depend on the function of personality traits in a given species (Biro & Stamps, 2008;  
502 Gu, Hughes, & Dorn, 2006). We can note that the variable for shyness on which we found a  
503 phenotypic correlation with fecundity and tibia length is the “change of speed in border area  
504 2”, which is also directly linked with speed abilities. Finally, an analysis of genetic correlations  
505 showed that the lines with the most exploratory individuals had the smallest numbers of  
506 offspring (Table 6). These correlations seem to be compatible with the pace-of-life syndrome  
507 (POLS) hypothesis, a currently debated hypothesis (Royauté, Berdal, Garrison, &  
508 Dochtermann, 2018), according to which, behavioural traits are related to morphological,  
509 physiological and other life-history traits (Réale et al. 2010).

510 ***Potential of personality traits for use in genetic improvement of biocontrol agents***

511 In this study, our aim was to evaluate the possibility of using personality traits as traits  
512 of interest in biological control, and of integrating these traits into genetic improvement  
513 programmes for the BCA *T. evanescens*. The six repeatable behavioural traits we measured  
514 were correlated with each other, and could be combined into two continuums. For each  
515 individual and continuum, we estimated a personality score corresponding to the position of the  
516 individual along the continuum, a common method in animal personality studies (Mazué et al.,  
517 2015; Monceau et al., 2017). We found that it was possible to capture a large proportion of the  
518 behavioural trait variance with two scores (36.2% of the total variance explained by personality  
519 score 1, and 26.4% explained by personality score 2). This finding highlights the utility of  
520 calculating a few synthetic indices (or scores), rather than measuring large numbers of  
521 variables, to obtain relevant information for BC. We therefore systematically present our results  
522 considering all the traits individually and summarized as two personality scores.

523 The relevance of the behavioural traits or synthetic scores to the context of BC was  
524 demonstrated by the phenotypic correlations between these traits and scores and the traits  
525 classically measured in BC (fecundity, longevity and body length) (Hopper et al., 1993; Prezotti  
526 et al., 2004; Roitberg et al., 2001; Smith, 1996). In this study, active females (i.e. with high  
527 values for “mean speed in area 4” and “personality score 2”) produced more offspring and had  
528 longer tibias (Table 4). By contrast, we found that bold females (i.e. with low values for “change  
529 of speed in border area 2” and “change of sinuosity in border area 2”) produced a small number  
530 of offspring (Table 4). In several species, activity and boldness behaviours have been shown to  
531 be correlated with traits of ecological importance, such as dispersal (Sih et al., 2004), which is  
532 also a trait linked to field efficiency in BC (Fournier & Boivin, 2000). Our results indicate that  
533 active females produce more offspring, which is predictive of a high degree of efficiency in  
534 rearing conditions and, in the case of parasitoids, in the field. Note, however, that we did not  
535 assess survival or body condition in the offspring. The same females also displayed shy

536 behaviour. The impact of a shy behaviour on an individual's field efficiency would depend on  
537 the agrosystem conditions. Indeed, in the presence of high densities of predators intraguild  
538 predation may occur (Bennett, Gillespie, Shipp, & VanLaerhoven, 2009; Dumont et al., 2018).  
539 In this scenario, shy parasitoid individuals (i.e. the intraguild preys) might be less predated as  
540 they might be less willing to take risks, compared to bold individuals. However, in situations  
541 where intraguild predation is not a challenge, bolder individuals, more willing to take risks,  
542 could be faster in finding resources (i.e. egg patches in the case of *Trichogramma* species).  
543 Therefore, further studies are required to assess the full ecological relevance of the lines we  
544 studied in BC. The relevance of the variables measured will be confirmed only if they are shown  
545 to be correlated with BC performance in industrial and field and/or greenhouse conditions.

546         Most of our data analyses aimed to evaluate the added value of the measured behavioural  
547 traits for genetic improvement strategies, breeding programs. We found that personality scores  
548 differ among isogenic lines (Figure 4.a. and Figure 4.b.) and that these differences highlight  
549 contrasted behaviours, as evidenced by their distribution along the two personality scores in  
550 Figure 5. This may make it possible to differentiate between these behaviours and to select for  
551 them, should they prove relevant in terms of BC efficiency. We also observed a negative genetic  
552 correlation between the personality score relating to exploration and offspring production. It  
553 will probably be important to take this trade-off into account in BC, as it may oppose  
554 performance in rearing and performance in the field. Indeed, as for activity and boldness,  
555 exploration behaviours are also correlated with traits linked to field efficiency in BC, such as  
556 dispersal (Fournier & Boivin, 2000; Sih et al., 2004).

557         Given these results, and the ease with which all the traits can be assessed and personality  
558 scores obtained through short (90 seconds) automated video-tracking measurements, the new  
559 method described here may provide useful criteria for the selection of candidate BCA taxa  
560 (populations, strains, sibling species, etc.) or for quality control purposes. However, the high

561 level of intra-isogenic line variability observed (Figure 4.a and Figure 4.b), accounting for the  
562 relatively low broad-sense heritability of the traits and scores (between 0.01 and 0.11; Table 5),  
563 constrains the use of this method, as it may be necessary to phenotype large numbers of  
564 individuals for reliable comparisons between taxa or reared populations. The low heritability  
565 also constitutes an obstacle to the implementation of ambitious experimental evolution  
566 programmes. Oriented experimental evolution may be fastidious for traits displaying such a  
567 high degree of environmentally induced variability. As a comparison, breeding programmes for  
568 livestock animals generally make use of traits with higher heritability. Heritability values for  
569 morphological, physiological, behavioural or other traits linked to fitness and considered in  
570 these breeding programmes generally range from 0.17 to 0.70 in sheep, pigs, cows and fish  
571 (Juengel et al., 2019; Kavlak & Uimari, 2019; Moretti, de Rezende, Biffani, & Bozzi, 2018;  
572 Vargas Jurado, Leymaster, Kuehn, & Lewis, 2016). However, in order to select traits with low  
573 heritability values, the method of genomic selection is already used for livestock animals (e.g.  
574 Hayes, Bowman, Chamberlain, & Goddard, 2009). This method is based on the phenotyping  
575 and genotyping of a high number of individuals in order to establish a statistical equation  
576 between the genotype and the phenotype. Based on this equation, it is then possible to predict  
577 the phenotype of an individual, knowing only its genotype (Hayes et al., 2009). This method  
578 has never been applied to BCA, but has been recently suggested as a promising application to  
579 BCA selection (Leung et al., 2020), and could help considering behavioural – and personality  
580 – traits in BCA selection programs.

## 581 **Conclusion**

582 In conclusion, the use of methods and concepts of animal personality to develop  
583 phenotyping methods and associated data analyses for BC led to the rapid phenotyping of traits  
584 rarely used in BC that were repeatable, heritable and correlated with fitness-related traits. Our  
585 results also provide support to investigate the interest of animal personality in other BCA

586 species (parasitoids or predators). However, it will be possible to consider the actual potential  
587 of these traits and of the phenotyping method satisfactory only after investigating the  
588 relationships between the laboratory-measured traits and BC performance indices in real BC  
589 situations, in industrial production settings or in field releases. This first study has driven the  
590 launch of large-scale field experiments, which are currently underway and aim to generate field-  
591 release performance indices.

592

### 593 **Acknowledgements**

594 We would like to thank all the members of staff at Institut Sophia Agrobiotech who  
595 helped us when we were overwhelmed by the sheer numbers of *Trichogramma* individuals in  
596 our experimental tubes, including Léa Tregoat-Bertrand in particular. Special thanks to Maxime  
597 Dahirel for helpful advice for statistical analysis, and to Morgane Bequet-Rennes and Simon  
598 Vaisse, who contributed to this study by running previous experiments that led to our decision  
599 to design this new phenotyping assay. We thank Marta Montserrat, Bart A. Pannebakker and  
600 François Dumont for their thoughtful comments. We thank the biocontrol company BIOLINE,  
601 in particular Paloma Martinez and Benoît Franck, and the INRAE biological resource centre  
602 “Egg-Parasitoids Collection” (CRB EP-Coll, Sophia Antipolis) for providing field-sampled  
603 populations for the establishment of some of the isogenic lines used in this study. We thank the  
604 Microscopy Platform of the Sophia Agrobiotech Institute, INRA, UNS, CNRS, UMR 1355-  
605 7254, INRA PACA, Sophia Antipolis for providing access to instruments and technical advice.  
606 This work was funded by the the French “Agence Nationale de la Recherche” under the  
607 “Investissements d’Avenir UCAJEDI” project with reference n ° ANR-15-IDEX-01. Silène  
608 Lartigue received financial support from the French Ministry in charge of Agriculture.

609

610 **Conflict of interest disclosure**

611 The authors of this article declare that they have no financial conflict of interest with the content  
612 of this article. Jérôme Moreau, François-Xavier Dechaume-Moncharmont and Vincent  
613 Calcagno belong to the panel of *PCIEcology* recommenders.

614 **Data and R code**

615 Data tables and code needed to re-do the analyses and figures are available on Zenodo  
616 (<http://doi.org/10.5281/zenodo.4058218>).

## 617 **References**

- 618 Abràmoff, M. D., Magalhães, P. J., & Ram, S. J. (2004). Image processing with imageJ.  
619 *Biophotonics International*, 11(7), 36–41.
- 620 Amat, I., Desouhant, E., Gomes, E., Moreau, J., & Monceau, K. (2018). Insect personality:  
621 what can we learn from metamorphosis? *Current Opinion in Insect Science*, 27, 46–51.
- 622 Ayvaz, A., Karasu, E., Karabörklü, S., Tunçbilek, A. Ş. (2008). Effects of cold storage, rearing  
623 temperature, parasitoid age and irradiation on the performance of *Trichogramma*  
624 *evanescens* Westwood (Hymenoptera: Trichogrammatidae). *Journal of Stored Products*  
625 *Research*, 44, 232–240.
- 626 Bates, D., Maechler, M., Bolker, B., & Walker, S. (2015). Fitting linear mixed-effects models  
627 using lme4. *Journal of Statistical Software*, 67(1), 1–48.
- 628 Bell, A. M., Hankison, S. J., & Laskowski, K. L. (2009). The repeatability of behaviour: a meta-  
629 analysis. *Animal Behaviour*, 77(4), 771–783.
- 630 Benjamini, Y., & Hochberg, Y. (1995). Controlling the false discovery rate: a practical and  
631 powerful approach to multiple testing. *Journal of the Royal Statistical Society: Series B*  
632 *(Methodological)*, 57(1), 289–300.
- 633 Bennett, J. A., Gillespie, D. R., Shipp, J. L., & VanLaerhoven, S. L. (2009). Foraging strategies  
634 and patch distributions: Intraguild interactions between *Dicyphus hesperus* and *Encarsia*  
635 *formosa*. *Ecological Entomology*, 34(1), 58–65.
- 636 Biro, P. A., & Stamps, J. A. (2008). Are animal personality traits linked to life-history  
637 productivity? *Trends in Ecology and Evolution*, 23(7), 361–368.
- 638 Bolnick, D. I., Amarasekare, P., Araújo, M. S., Bürger, R., Levine, J. M., Novak, M., ...  
639 Vasseur, D. A. (2011). Why intraspecific trait variation matters in community ecology.  
640 *Trends in Ecology and Evolution*, 26(4), 183–192.
- 641 Branson, K., Robie, A. A., Bender, J., Perona, P., & Dickinson, M. H. (2009). High-throughput  
642 ethomics in large groups of *Drosophila*. *Nature Methods*, 6(6), 451–457.
- 643 Briese, D. T. (2000). Classical biological control. *Australian Weed Management Systems*, 161–  
644 192.
- 645 Charalabidis, A., Dechaume-Moncharmont, F. X., Petit, S., & Bohan, D. A. (2017). Risk of  
646 predation makes foragers less choosy about their food. *PLoS ONE*, 12(11), 1–18.
- 647 Cõnsoli, F. L., & Parra, J. R. P. (1995). Effects of constant and alternating temperatures on  
648 *Trichogramma galloi* Zucchi (Hym., Trichogrammatidae) biology II.-parasitism capacity  
649 and longevity. *Journal of Applied Entomology*, 119, 667–670.
- 650 Cote, J., Fogarty, S., Weinersmith, K., Brodin, T., & Sih, A. (2010). Personality traits and  
651 dispersal tendency in the invasive mosquitofish (*Gambusia affinis*). *Proceedings of the*  
652 *Royal Society B: Biological Sciences*, 277(1687), 1571–1579.
- 653 Dingemanse, N. J., Kazem, A. J. N., Reale, D., & Wright, J. (2009). Behavioural reaction  
654 norms : animal personality meets individual plasticity. *Trends in Ecology and Evolution*,  
655 25(2), 81–89.
- 656 Dochtermann, N. A., Schwab, T., Anderson Berdal, M., Dalos, J., & Royauté, R. (2019). The  
657 heritability of behavior: a meta-analysis. *Journal of Heredity*, 110(4), 403–410.

- 658 Dochtermann, N. A., Schwab, T., & Sih, A. (2014). The contribution of additive genetic  
659 variation to personality variation: heritability of personality. *Proceedings of the Royal*  
660 *Society B: Biological Sciences*, 282(1798).
- 661 Dumont, F., Aubry, O., & Lucas, E. (2018). From evolutionary aspects of zoophytophagy to  
662 biological control. *Frontiers in Ecology and Evolution*, 6, 1–15.
- 663 Dumont, F., Réale, D., & Lucas, E. (2017). Isogroup selection to optimize biocontrol increases  
664 cannibalism in omnivorous (Zoophytophagous) bugs. *Insects*, 8(3).
- 665 Eilenberg, J., Hajek, A., & Lomer, C. (2001). Suggestions for unifying the terminology in  
666 biological control. *BioControl*, 46(4), 387–400.
- 667 Fournier, F., & Boivin, G. (2000). Comparative dispersal of *Trichogramma evanescens* and  
668 *Trichogramma pretiosum* (Hymenoptera: Trichogrammatidae) in relation to  
669 environmental conditions. *Population Ecology*, 29(1), 55–63.
- 670 Godfray, H. C. J., Beddington, J. R., Crute, I. R., Haddad, L., Lawrence, D., Muir, J. F., ...  
671 Toulmin, C. (2010). Food security: the challenge of feeding 9 billion people. *Science*, 327,  
672 812–818.
- 673 Gomes, E., Desouhant, E., & Amat, I. (2019). Evidence for risk-taking behavioural types and  
674 potential effects on resource acquisition in a parasitoid wasp. *Animal Behaviour*, 154, 17–  
675 28.
- 676 Gosling, S. D. (2001). From mice to men: what can we learn about personality from animal  
677 research? *Psychological Bulletin*, 127(1), 45–86.
- 678 Gu, H., Hughes, J., & Dorn, S. (2006). Trade-off between mobility and fitness in *Cydia*  
679 *pomonella* L. (Lepidoptera: Tortricidae). *Ecological Entomology*, 31(1), 68–74.
- 680 Hartig, F. (2019). DHARMA: Residual Diagnostics for Hierarchical (Multi-Level / Mixed)  
681 Regression Models. Retrieved from <https://cran.r-project.org/package=DHARMA>
- 682 Hassan, S. A. (1993). The mass rearing and utilization of *Trichogramma* to control  
683 lepidopterous pests, achievements and outlook. *Pesticide Science*, 37, 387–391.
- 684 Hayes, B. J., Bowman, P. J., Chamberlain, A. J., & Goddard, M. E. (2009). Invited review:  
685 Genomic selection in dairy cattle: Progress and challenges. *Journal of Dairy Science*,  
686 92(2), 433–443.
- 687 Hervé, M. (2020). RVAideMemoire: testing and plotting procedures for biostatistics. Retrieved  
688 from <https://cran.r-project.org/package=RVAideMemoire>
- 689 Hopper, K. R., Roush, R. T., & Powell, W. (1993). Management of genetics of biological-  
690 control introductions. *Annual Review of Entomology*, 38, 27–51.
- 691 Hothorn, T., Bretz, F., & Westfall, P. (2008). Simultaneous inference in general parametric  
692 models. *Biometrical Journal*, 50(3), 346–363.
- 693 Juengel, J. L., Hickey, S. M., Clarke, S. M., Cullen, N. G., McEwan, J. C., & Dodds, K. G.  
694 (2019). Heritability of ram mating success in multi-sire breeding situations. *Animal*, 13(5),  
695 917–923.
- 696 Kassambara, A., & Mundt, F. (2019). factoextra: extract and visualize the results of multivariate  
697 data analyses. Retrieved from <https://cran.r-project.org/package=factoextra>



- 698 Kavlak, A. T., & Uimari, P. (2019). Estimation of heritability of feeding behaviour traits and  
699 their correlation with production traits in Finnish Yorkshire pigs. *Journal of Animal*  
700 *Breeding and Genetics*, 136(6), 484–494.
- 701 Kralj-fiser, S., & Schuett, W. (2014). Studying personality variation in invertebrates : why  
702 bother ? *Animal Behaviour*, 91, 41–52.
- 703 Kruitwagen, A., Beukeboom, L. W., & Wertheim, B. (2018). Optimization of native biocontrol  
704 agents, with parasitoids of the invasive pest *Drosophila suzukii* as an example.  
705 *Evolutionary Applications*, 11(9), 1473–1497.
- 706 Le, S., Josse, J., & Husson, F. (2008). FactoMineR: an R package for multivariate analysis.  
707 *Journal of Statistical Software*, 25(1), 1–18.
- 708 Leung, K., Ras, E., Ferguson, K. B., Ariëns, S., Babendreier, D., Bijma, P., ... Pannebakker, B.  
709 A. (2020). Next-generation biological control: the need for integrating genetics and  
710 genomics. *Biological Reviews*, 95(6), 1838–1854.
- 711 Lirakis, M., & Magalhães, S. (2019). Does experimental evolution produce better biological  
712 control agents? A critical review of the evidence. *Entomologia Experimentalis et*  
713 *Applicata*, 167(7), 584–597.
- 714 Lommen, S. T. E., Jong, P. W. De, & Pannebakker, B. A. (2017). It is time to bridge the gap  
715 between exploring and exploiting : prospects for utilizing intraspecific genetic variation to  
716 optimize arthropods for augmentative pest control – a review. *Entomologia Experimentalis*  
717 *et Applicata*, 168, 108–123.
- 718 Lynch, M., & Walsh, B. (1998). *Genetics and Analysis of Quantitative Traits*. Sunderland, MA:  
719 Sinauer.
- 720 Mackauer, M. (1976). Genetic problems in the production of biological control agents. *Annual*  
721 *Review of Entomology*, 21(1), 369–385.
- 722 Mazué, G. P. F., Dechaume-Moncharmont, F. X., & Godin, J. G. J. (2015). Boldness-  
723 exploration behavioral syndrome: Interfamily variability and repeatability of personality  
724 traits in the young of the convict cichlid (*Amatitlania siquia*). *Behavioral Ecology*, 26(3),  
725 900–908.
- 726 Mclean, D. J., & Volponi, M. A. S. (2018). trajr : An R package for characterisation of animal  
727 trajectories, 440–448
- 728 Michalko, R., Pekár, S., & Entling, M. H. (2019). An updated perspective on spiders as  
729 generalist predators in biological control. *Oecologia*, 189(1), 21–36.
- 730 Mills, Nicholas J., & Kean, J. M. (2010). Behavioral studies, molecular approaches, and  
731 modeling: methodological contributions to biological control success. *Biological Control*,  
732 52(3), 255–262.
- 733 Mills, Nick J, & Wajnberg, E. (2008). Optimal foraging behaviour and efficient biological  
734 control methods. *Behavioural Ecology of Insect Parasitoids—From Theoretical*  
735 *Approaches to Field Applications*, 3–30.
- 736 Monceau, K., Dechaume-Moncharmont, F. X., Moreau, J., Lucas, C., Capoduro, R., Motreuil,  
737 S., & Moret, Y. (2017). Personality, immune response and reproductive success: an  
738 appraisal of the pace-of-life syndrome hypothesis. *Journal of Animal Ecology*, 86, 932–  
739 942.

- 740 Moretti, R., de Rezende, M. P. G., Biffani, S., & Bozzi, R. (2018). Heritability and genetic  
741 correlations between rumination time and production traits in Holstein dairy cows during  
742 different lactation phases. *Journal of Animal Breeding and Genetics*, *135*(4), 293–299.
- 743 Nachappa, P., Margolies, D. C., Nechols, J. R., & Campbell, J. F. (2011). Variation in predator  
744 foraging behaviour changes predator-prey spatio-temporal dynamics. *Functional Ecology*,  
745 *25*(6), 1309–1317.
- 746 Nachappa, P., Margolies, D. C., Nechols, J. R., & Morgan, T. J. (2010). Response of a complex  
747 foraging phenotype to artificial selection on its component traits. *Evolutionary Ecology*,  
748 *24*(4), 631–655.
- 749 Nakagawa, S., & Cuthill, I. C. (2007). Effect size, confidence interval and statistical  
750 significance: A practical guide for biologists. *Biological Reviews*, *82*(4), 591–605.
- 751 Nakagawa, S., & Schielzeth, H. (2010). Repeatability for Gaussian and non-Gaussian data: a  
752 practical guide for biologists. *Biological Reviews*, *85*, 935–956.
- 753 Prezotti, L., Parra, J. R. P., Vencovsky, R., Coelho, A. S. G., & Cruz, I. (2004). Effect of the  
754 size of the founder population on the quality of sexual populations of *Trichogramma*  
755 *pretiosum*, in laboratory. *Biological Control*, *30*(2), 174–180.
- 756 R Core Team. (2019). R: A language and environment for statistical computing. Vienna: R  
757 Foundation for Statistical Computing. Retrieved from <https://www.r-project.org/>
- 758 Réale, D., Garant, D., Humphries, M. M., Bergeron, P., Careau, V., & Montiglio, P. O. (2010).  
759 Personality and the emergence of the pace-of-life syndrome concept at the population  
760 level. *Philosophical Transactions of the Royal Society of London. Series B, Biological*  
761 *Sciences*, *365*(1560), 4051–4063.
- 762 Réale, Denis, Reader, S. M., Sol, D., McDougall, P. T., & Dingemanse, N. J. (2007). Integrating  
763 animal temperament within ecology and evolution. *Biological Reviews*, *82*(2), 291–318.
- 764 Robin, D. C., & Marchand, P. A. (2020). Macroorganismes de biocontrôle en France, état des  
765 lieux. *Innovations Agronomiques*, *79*, 425–439.
- 766 Roitberg, B. D. (2007). Why pest management needs behavioral ecology and vice versa.  
767 *Entomological Research*, *37*, 14–18.
- 768 Roitberg, B. D., Boivin, G., & Vet, L. E. M. (2001). Fitness, parasitoids, and biological control:  
769 an opinion. *The Canadian Entomologist*, *133*, 429–438.
- 770 Royauté, R., Berdal, M. A., Garrison, C. R., & Dochtermann, N. A. (2018). Painless life? A  
771 meta-analysis of the pace-of-life syndrome hypothesis. *Behavioral Ecology and*  
772 *Sociobiology*, 72–64.
- 773 Royauté, R., Buddle, C. M., & Vincent, C. (2014). Interpopulation Variations in Behavioral  
774 Syndromes of a Jumping Spider from Insecticide-Treated and Insecticide-Free Orchards.  
775 *Ethology*, *120*(2), 127–139.
- 776 Schöller, M., & Hassan, S. A. (2001). Comparative biology and life tables of *Trichogramma*  
777 *evanescens* and *T. cacoeciae* with *Ephesia elutella* as host at four constant temperatures.  
778 *Entomologia Experimentalis et Applicata*, *98*(1), 35–40.
- 779 Sforza, R. (2010). Recherche et évaluation des candidats pour la lutte biologique classique. In  
780 *La lutte biologique. Vers de nouveaux équilibres écologiques* (Quae-Educa, pp. 280–285).

- 781 Sih, A., Bell, A., & Johnson, J. C. (2004). Behavioral syndromes: an ecological and  
782 evolutionary overview. *Trends in Ecology and Evolution*, *19*(7), 372–378.
- 783 Sih, A., Cote, J., Evans, M., Fogarty, S., & Pruitt, J. (2012). Ecological implications of  
784 behavioural syndromes. *Ecology Letters*, *15*, 278–289.
- 785 Smith, S. M. (1996). Biological control with *Trichogramma*: advances, successes, and potential  
786 of their use. *Annual Review of Entomology*, *41*, 375–406.
- 787 Stirling, D. G., Reale, D., & Roff, D. A. (2002). Selection, structure and the heritability of  
788 behaviour. *Journal of Evolutionary Biology*, *15*, 277–289.
- 789 Stoffel, M. A., Nakagawa, S., & Schielzeth, H. (2017). rptR: repeatability estimation and  
790 variance decomposition by generalized linear mixed-effects models. *Methods in Ecology  
791 and Evolution*, *8*(11), 1639–1644.
- 792 Suverkropp, B. P., Bigler, F., & Van Lenteren, J. C. (2001). Temperature influences walking  
793 speed and walking activity of *Trichogramma brassicae* (Hym., Trichogrammatidae).  
794 *Journal of Applied Entomology*, *125*(6), 303–307.
- 795 Tabone, E., Bardon, C., Desneux, N., & Wajnberg, E. (2010). Parasitism of different  
796 *Trichogramma* species and strains on *Plutella xylostella* L. on greenhouse cauliflower.  
797 *Journal of Pest Science*, *83*(3), 251–256.
- 798 Thibierge. (2015). *Innovations Agronomiques* 46 (2015), 27-37, 46, 27–37.
- 799 van Lenteren, J. C. (2012). The state of commercial augmentative biological control: Plenty of  
800 natural enemies, but a frustrating lack of uptake. *BioControl*, *57*(1), 1–20.
- 801 van Ooers, K., & Sinn, D. L. (2011). Toward a basis for the phenotypic gambit: Advances in the  
802 evolutionary genetics of animal personalities. In *From genes to animal behavior* (pp.  
803 165–183). Springer, Tokyo.
- 804 Vargas Jurado, N., Leymaster, K. A., Kuehn, L. A., & Lewis, R. M. (2016). Estimating  
805 heritability of wool shedding in a cross-bred ewe population. *Journal of Animal Breeding  
806 and Genetics*, *133*(5), 396–403.
- 807 Wajnberg, E. (2004). Measuring genetic variation in natural enemies used for biological  
808 control: why and how? In *Genetics, Evolution and Biological Control*.
- 809 Wajnberg, E. (2009). Genetics of the behavioral ecology of egg parasitoids. In *Egg Parasitoids  
810 in Agroecosystems with Emphasis on Trichogramma* (pp. 149–165). Springer, Dordrecht.
- 811 Wajnberg, E., Bernstein, C., & Alphen, J. J. M. Van. (2008). *Behavioral ecology of insect  
812 parasitoids: from theoretical approaches to field applications*. Blackwell Publishing.
- 813 Wajnberg, E., Curty, C., & Jervis, M. (2012). Intra-population genetic variation in the temporal  
814 pattern of egg maturation in a parasitoid wasp. *PLoS ONE*, *7*(9).
- 815 Wajnberg, E., Roitberg, B. D., & Boivin, G. (2016). Using optimality models to improve the ef  
816 fi cacy of parasitoids in biological control programmes. *Entomologia Experimentalis et  
817 Applicata*, *158*, 2–16.
- 818 Willer, H., & Lernoud, J. (2019). *The world of organic agriculture: Statistics and emerging  
819 trends 2019*. Bonn.
- 820 Wolf, M., & Weissing, F. J. (2012). Animal personalities : consequences for ecology and

821 evolution. *Trends in Ecology & Evolution*, 27(8), 452–461.
